# Supplementary material for: Properties of polyplexes formed through interaction between hydrophobically-modified poly(ethylene imine)s and calf thymus DNA in aqueous solution
Source: Royal Society of Chemistry journal article supplement (doi:10.1039/c6sm02835g), 2017-01-01

Supplementary information

Properties of polyplexes formed through  
interaction between hydrophobically-modified  
(polyethylene imine)s and calf thymus DNA in  
aqueous solution

Ismael C. Bellettini <sup>\*,a,†</sup>, Samira J. Fayad <sup>a</sup>, Vanderlei G. Machado <sup>a</sup>, and Edson Minatti<sup>a</sup>

<sup>a</sup> Departamento de Química, Universidade Federal de Santa Catarina, UFSC,

Florianópolis, SC, 88040–900, Brazil

\* Corresponding authors.

E-mail addresses: ismael.bellettini@ufsc.br (I.C. Bellettini)

†Current address: Universidade Federal de Santa Catarina, UFSC, Campus de Blumenau, Blumenau, SC, 89065–300, Brazil.

**Figure 1S.** UV–Vis spectra of ctDNA–PEIC4 systems in water at N/P ratios of: **(A)** 0.0, 0.3, 0.6, 1.2; **(B)** 1.8, 2.4; and **(C)** 3.0, 3.6, 4.8, 6.0, 7.5, and 9.0.

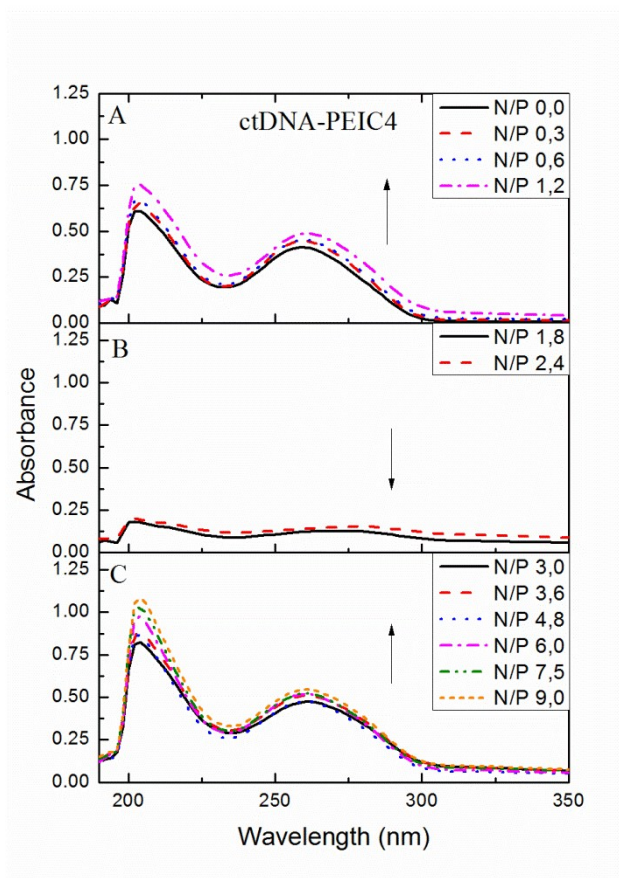

**Figure 2S.** UV–Vis spectra of ctDNA–PEIC6 systems in water at N/P ratios of: **(A)** 0.0, 0.3, 0.6, 1.2; **(B)** 1.8, 2.4; and **(C)** 3.0, 3.6, 4.8, 6.0, 7.5, and 9.0.

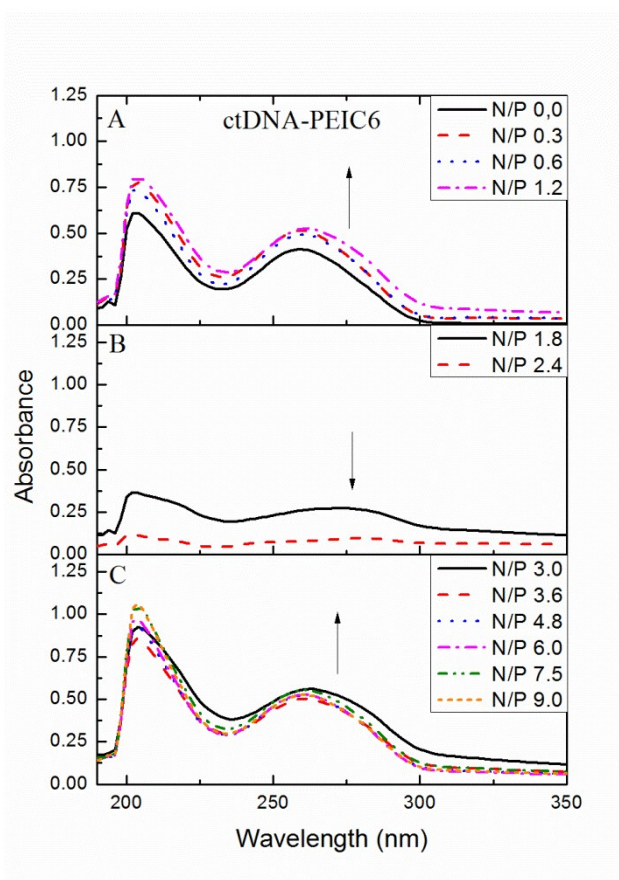

**Figure 3S.** UV–Vis spectra of ctDNA–PEIC8 systems in water at N/P ratios of: **(A)** 0.0, 0.3, 0.6, 1.2; 1.8; **(B)** 2.4, 3.0; and **(C)** 3.6, 4.8, 6.0, 7.5, and 9.0.

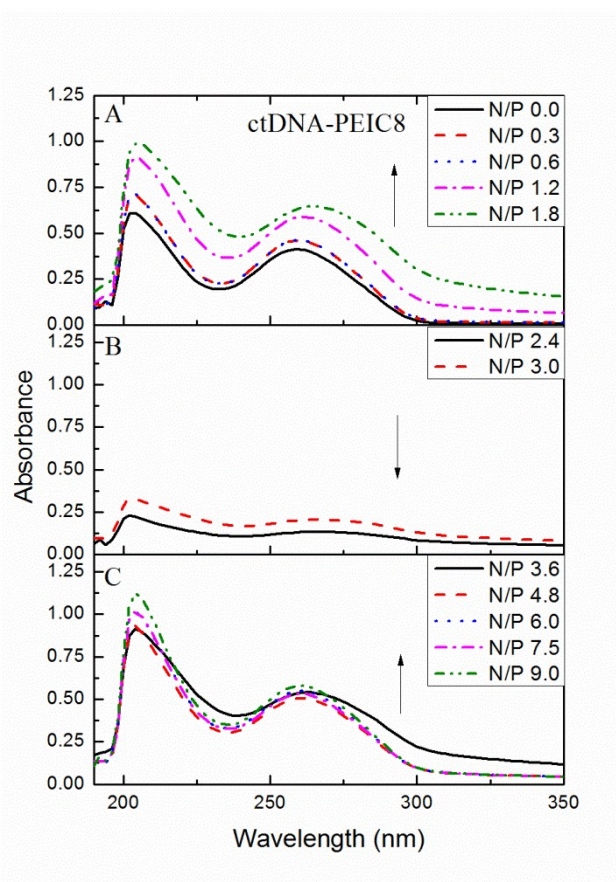

**Figure 4S.** UV–Vis spectra of ctDNA–PEIC12 systems in water at N/P ratios of: **(A)** 0.0, 0.3, 0.6, 1.2; 1.8; **(B)** 2.4, 3.0; and **(C)** 3.6, 4.8, 6.0, 7.5, and 9.0.

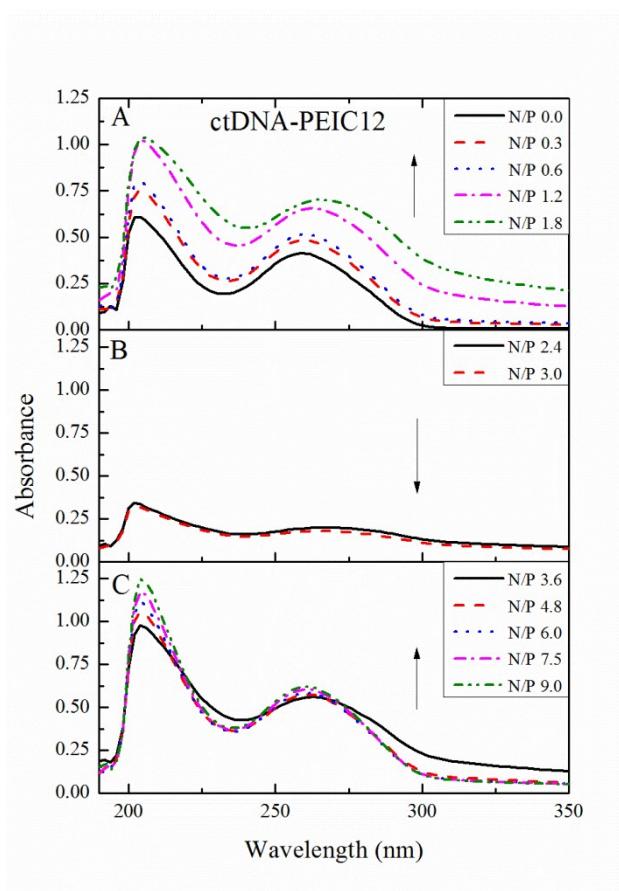

Supplement: c6sm02835g1.pdf [file c6sm02835g1.pdf]
